# Supplementary material for: Transporter genes expressed by coastal bacterioplankton in response to dissolved organic carbon
Source: PubMed Central journal article supplement (PMC2847192; doi:10.1111/j.1462-2920.2009.02102.x), 2010-03

## Transporter Genes Expressed by Coastal Bacterioplankton in Response to Dissolved Organic Carbon

Rachel S. Poretsky, Shulei Sun, Xiaozhen Mou, and Mary Ann Moran

Table S1. Number of bacterioplankton transcript sequences assigned to transporter-related COGs. The total number of sequences differs for each sample (see Table 1).

| COG number | COG Category                        | COG name                                                                                | Control 1 | Control 2 | Phyto-DOC | VP-DOC |
|------------|-------------------------------------|-----------------------------------------------------------------------------------------|-----------|-----------|-----------|--------|
| COG0410    | Amino acid transport and metabolism | ABC-type branched-chain amino acid transport systems, ATPase component                  | 31        | 13        | 33        | 43     |
| COG0411    |                                     | ABC-type branched-chain amino acid transport systems, ATPase component                  | 15        | 10        | 38        | 31     |
| COG0444    |                                     | ABC-type dipeptide/oligopeptide/nickel transport system, ATPase component               | 20        | 11        | 15        | 10     |
| COG0531    |                                     | Amino acid transporters                                                                 | 9         | 6         | 7         | 7      |
| COG0559    |                                     | Branched-chain amino acid ABC-type transport system, permease components                | 32        | 14        | 54        | 49     |
| COG0591    |                                     | Na <sup>+</sup> /proline symporter                                                      | 11        | 7         | 17        | 26     |
| COG0601    |                                     | ABC-type dipeptide/oligopeptide/nickel transport systems, permease components           | 40        | 21        | 50        | 59     |
| COG0683    |                                     | ABC-type branched-chain amino acid transport systems, periplasmic component             | 71        | 29        | 45        | 44     |
| COG0747    |                                     | ABC-type dipeptide transport system, periplasmic component                              | 72        | 39        | 122       | 106    |
| COG0765    |                                     | ABC-type amino acid transport system, permease component                                | 17        | 7         | 63        | 68     |
| COG0814    |                                     | Amino acid permeases                                                                    | 1         | 0         | 0         | 2      |
| COG0834    |                                     | ABC-type amino acid transport/signal transduction systems, periplasmic component/domain | 274       | 104       | 263       | 372    |
| COG1114    |                                     | Branched-chain amino acid permeases                                                     | 0         | 0         | 1         | 0      |
| COG1115    |                                     | Na <sup>+</sup> /alanine symporter                                                      | 34        | 18        | 80        | 114    |
| COG1124    |                                     | ABC-type dipeptide/oligopeptide/nickel transport system, ATPase component               | 1         | 0         | 2         | 1      |
| COG1125    |                                     | ABC-type proline/glycine betaine transport systems, ATPase components                   | 1         | 0         | 0         | 1      |
| COG1126    |                                     | ABC-type polar amino acid transport system, ATPase component                            | 27        | 10        | 45        | 41     |
| COG1173    |                                     | ABC-type dipeptide/oligopeptide/nickel transport systems, permease components           | 35        | 21        | 50        | 61     |
| COG1174    |                                     | ABC-type proline/glycine betaine transport systems, permease component                  | 1         | 2         | 2         | 0      |
| COG1176    |                                     | ABC-type spermidine/putrescine transport system, permease component I                   | 13        | 11        | 25        | 30     |
| COG1177    |                                     | ABC-type spermidine/putrescine transport system, permease component II                  | 7         | 7         | 25        | 34     |
| COG1296    |                                     | Predicted branched-chain amino acid permease (azaleucine resistance)                    | 5         | 2         | 6         | 6      |

|         |                                       |                                                                                        |     |     |     |     |
|---------|---------------------------------------|----------------------------------------------------------------------------------------|-----|-----|-----|-----|
| COG2113 |                                       | ABC-type proline/glycine betaine transport systems, periplasmic components             | 53  | 18  | 57  | 63  |
| COG3104 |                                       | Dipeptide/tripeptide permease                                                          | 14  | 5   | 34  | 31  |
| COG3633 |                                       | Na <sup>+</sup> /serine symporter                                                      | 1   | 0   | 3   | 2   |
| COG3842 |                                       | ABC-type spermidine/putrescine transport systems, ATPase components                    | 22  | 9   | 53  | 57  |
| COG4160 |                                       | ABC-type arginine/histidine transport system, permease component                       | 0   | 1   | 4   | 1   |
| COG4166 |                                       | ABC-type oligopeptide transport system, periplasmic component                          | 18  | 10  | 21  | 33  |
| COG4175 |                                       | ABC-type proline/glycine betaine transport system, ATPase component                    | 9   | 9   | 14  | 26  |
| COG4176 |                                       | ABC-type proline/glycine betaine transport system, permease component                  | 14  | 6   | 44  | 20  |
| COG4177 |                                       | ABC-type branched-chain amino acid transport system, permease component                | 23  | 10  | 42  | 47  |
| COG4215 |                                       | ABC-type arginine transport system, permease component                                 | 2   | 0   | 3   | 2   |
| COG4597 |                                       | ABC-type amino acid transport system, permease component                               | 13  | 10  | 34  | 47  |
| COG4598 |                                       | ABC-type histidine transport system, ATPase component                                  | 2   | 2   | 6   | 4   |
| COG4608 |                                       | ABC-type oligopeptide transport system, ATPase component                               | 23  | 9   | 23  | 7   |
| COG0395 | Carbohydrate transport and metabolism | ABC-type sugar transport system, permease component                                    | 27  | 17  | 89  | 140 |
| COG0580 |                                       | Glycerol uptake facilitator and related permeases (Major Intrinsic Protein Family)     | 11  | 4   | 13  | 18  |
| COG0738 |                                       | Fucose permease                                                                        | 4   | 0   | 11  | 13  |
| COG1129 |                                       | ABC-type sugar transport system, ATPase component                                      | 25  | 10  | 37  | 60  |
| COG1134 |                                       | ABC-type polysaccharide/polyol phosphate transport system, ATPase component            | 4   | 4   | 13  | 8   |
| COG1172 |                                       | Ribose/xylose/arabinose/galactoside ABC-type transport systems, permease components    | 28  | 24  | 84  | 97  |
| COG1175 |                                       | ABC-type sugar transport systems, permease components                                  | 44  | 33  | 113 | 187 |
| COG1263 |                                       | Phosphotransferase system IIC components, glucose/maltose/N-acetylglucosamine-specific | 0   | 0   | 2   | 5   |
| COG1264 |                                       | Phosphotransferase system IIB components                                               | 0   | 0   | 0   | 2   |
| COG1299 |                                       | Phosphotransferase system, fructose-specific IIC component                             | 0   | 0   | 0   | 1   |
| COG1455 |                                       | Phosphotransferase system cellobiose-specific component IIC                            | 0   | 1   | 0   | 1   |
| COG1593 |                                       | TRAP-type C4-dicarboxylate transport system, large permease component                  | 42  | 32  | 153 | 100 |
| COG1638 |                                       | TRAP-type C4-dicarboxylate transport system, periplasmic component                     | 40  | 22  | 54  | 108 |
| COG1653 |                                       | ABC-type sugar transport system, periplasmic component                                 | 334 | 189 | 450 | 584 |
| COG1682 |                                       | ABC-type polysaccharide/polyol phosphate export systems, permease component            | 3   | 0   | 2   | 4   |
| COG1879 |                                       | ABC-type sugar transport system, periplasmic component                                 | 182 | 52  | 118 | 159 |
| COG1925 |                                       | Phosphotransferase system, HPr-related proteins                                        | 0   | 1   | 9   | 9   |
| COG2190 |                                       | Phosphotransferase system IIA components                                               | 0   | 0   | 2   | 4   |
| COG2211 |                                       | Na <sup>+</sup> /melibiose symporter and related transporters                          | 8   | 8   | 5   | 2   |

|         |                                          |                                                                                                                            |                                                                                             |    |     |     |
|---------|------------------------------------------|----------------------------------------------------------------------------------------------------------------------------|---------------------------------------------------------------------------------------------|----|-----|-----|
| COG2213 |                                          | Phosphotransferase system, mannitol-specific IIBC component                                                                | 0                                                                                           | 4  | 3   | 1   |
| COG2271 |                                          | Sugar phosphate permease                                                                                                   | 3                                                                                           | 0  | 0   | 0   |
| COG2893 |                                          | Phosphotransferase system, mannitol-specific IIBC component                                                                | 0                                                                                           | 4  | 3   | 1   |
| COG3090 |                                          | TRAP-type C4-dicarboxylate transport system, small permease component                                                      | 4                                                                                           | 0  | 30  | 18  |
| COG3730 |                                          | Phosphotransferase system sorbitol-specific component IIC                                                                  | 0                                                                                           | 1  | 0   | 1   |
| COG3732 |                                          | Phosphotransferase system sorbitol-specific component IIBC                                                                 | 0                                                                                           | 5  | 1   | 3   |
| COG3833 |                                          | ABC-type maltose transport systems, permease component                                                                     | 2                                                                                           | 0  | 5   | 8   |
| COG3839 |                                          | ABC-type sugar transport systems, ATPase components                                                                        | 63                                                                                          | 22 | 131 | 149 |
| COG4213 |                                          | ABC-type xylose transport system, periplasmic component                                                                    | 0                                                                                           | 0  | 1   | 3   |
| COG4214 |                                          | ABC-type xylose transport system, permease component                                                                       | 0                                                                                           | 2  | 9   | 7   |
| COG5037 |                                          | Gluconate transport-inducing protein                                                                                       | 2                                                                                           | 0  | 0   | 1   |
| COG1292 | Cell envelope biogenesis, outer membrane | Choline-glycine betaine transporter                                                                                        | 23                                                                                          | 10 | 25  | 39  |
| COG1596 |                                          | Periplasmic protein involved in polysaccharide export                                                                      | 1                                                                                           | 4  | 6   | 7   |
| COG1696 |                                          | Predicted membrane protein involved in D-alanine export                                                                    | 3                                                                                           | 5  | 10  | 10  |
| COG1732 |                                          | Periplasmic glycine betaine/choline-binding (lipo)protein of an ABC-type transport system (osmoprotectant binding protein) | 0                                                                                           | 0  | 3   | 1   |
| COG3562 |                                          | Capsule polysaccharide export protein                                                                                      | 0                                                                                           | 0  | 1   | 1   |
| COG3563 |                                          | Capsule polysaccharide export protein                                                                                      | 0                                                                                           | 0  | 1   | 2   |
| COG4591 |                                          | ABC-type transport system, involved in lipoprotein release, permease component                                             | 9                                                                                           | 5  | 27  | 25  |
| COG3225 |                                          | Cell motility and secretion                                                                                                | ABC-type uncharacterized transport system involved in gliding motility, auxiliary component | 2  | 1   | 1   |
| COG2978 | Coenzyme metabolism                      | Putative p-aminobenzoyl-glutamate transporter                                                                              | 3                                                                                           | 0  | 2   | 1   |
| COG2998 |                                          | ABC-type tungstate transport system, permease component                                                                    | 3                                                                                           | 2  | 2   | 6   |
| COG3201 |                                          | Nicotinamide mononucleotide transporter                                                                                    | 1                                                                                           | 0  | 0   | 2   |
| COG3840 |                                          | ABC-type thiamine transport system, ATPase component                                                                       | 2                                                                                           | 1  | 1   | 2   |
| COG4143 |                                          | ABC-type thiamine transport system, periplasmic component                                                                  | 3                                                                                           | 3  | 4   | 9   |
| COG4145 |                                          | Na <sup>+</sup> /panthothenate symporter                                                                                   | 3                                                                                           | 1  | 0   | 2   |
| COG4662 |                                          | ABC-type tungstate transport system, periplasmic component                                                                 | 0                                                                                           | 1  | 2   | 3   |
| COG0534 | Defense Mechanisms                       | Na <sup>+</sup> -driven multidrug efflux pump                                                                              | 0                                                                                           | 17 | 29  | 36  |
| COG0577 |                                          | ABC-type antimicrobial peptide transport system, permease component                                                        | 17                                                                                          | 12 | 33  | 31  |
| COG0842 |                                          | ABC-type multidrug transport system, permease component                                                                    | 13                                                                                          | 9  | 29  | 31  |
| COG1131 |                                          | ABC-type multidrug transport system, ATPase component                                                                      | 47                                                                                          | 23 | 43  | 59  |
| COG1132 |                                          | ABC-type multidrug transport system, ATPase and permease components                                                        | 90                                                                                          | 44 | 87  | 124 |
| COG1136 |                                          | ABC-type antimicrobial peptide transport system, ATPase component                                                          | 59                                                                                          | 21 | 40  | 63  |
| COG2274 |                                          | ABC-type bacteriocin/lantibiotic exporters, contain an N-terminal double-glycine peptidase domain                          | 5                                                                                           | 4  | 15  | 25  |

|         |                                  |                                                                                                        |     |    |     |     |
|---------|----------------------------------|--------------------------------------------------------------------------------------------------------|-----|----|-----|-----|
| COG0651 | Energy production and conversion | Formate hydrogenlyase subunit 3/Multisubunit Na <sup>+</sup> /H <sup>+</sup> antiporter, MnhD subunit  | 13  | 8  | 20  | 21  |
| COG1301 |                                  | Na <sup>+</sup> /H <sup>+</sup> -dicarboxylate symporters                                              | 15  | 2  | 23  | 28  |
| COG1347 |                                  | Na <sup>+</sup> -transporting NADH:ubiquinone oxidoreductase, subunit NqrD                             | 16  | 7  | 60  | 108 |
| COG1620 |                                  | L-lactate permease                                                                                     | 4   | 1  | 0   | 2   |
| COG1726 |                                  | Na <sup>+</sup> -transporting NADH:ubiquinone oxidoreductase, subunit NqrA                             | 19  | 9  | 33  | 57  |
| COG1757 |                                  | Na <sup>+</sup> /H <sup>+</sup> antiporter                                                             | 14  | 9  | 18  | 13  |
| COG1805 |                                  | Na <sup>+</sup> -transporting NADH:ubiquinone oxidoreductase, subunit NqrB                             | 21  | 11 | 98  | 189 |
| COG1883 |                                  | Na <sup>+</sup> -transporting methylmalonyl-CoA/oxaloacetate decarboxylase, beta subunit               | 4   | 5  | 20  | 25  |
| COG2209 |                                  | Na <sup>+</sup> -transporting NADH:ubiquinone oxidoreductase, subunit NqrE                             | 11  | 3  | 61  | 108 |
| COG2851 |                                  | H <sup>+</sup> /citrate symporter                                                                      | 0   | 0  | 2   | 1   |
| COG2869 |                                  | Na <sup>+</sup> -transporting NADH:ubiquinone oxidoreductase, subunit NqrC                             | 6   | 4  | 32  | 36  |
| COG2871 |                                  | Na <sup>+</sup> -transporting NADH:ubiquinone oxidoreductase, subunit NqrF                             | 9   | 21 | 105 | 157 |
| COG3630 |                                  | Na <sup>+</sup> -transporting methylmalonyl-CoA/oxaloacetate decarboxylase, gamma subunit              | 0   | 0  | 0   | 2   |
| COG4987 |                                  | ABC-type transport system involved in cytochrome bd biosynthesis, fused ATPase and permease components | 1   | 0  | 0   | 1   |
| COG4988 |                                  | ABC-type transport system involved in cytochrome bd biosynthesis, ATPase and permease components       | 0   | 0  | 0   | 1   |
| COG5295 | Extracellular structures         | Autotransporter adhesin                                                                                | 5   | 4  | 3   | 2   |
| COG0385 | General function prediction only | Predicted Na <sup>+</sup> -dependent transporter                                                       | 7   | 0  | 5   | 6   |
| COG0477 |                                  | Permeases of the major facilitator superfamily                                                         | 127 | 44 | 195 | 184 |
| COG0488 |                                  | ATPase components of ABC transporters with duplicated ATPase domains                                   | 99  | 35 | 104 | 193 |
| COG0628 |                                  | Predicted permease                                                                                     | 6   | 13 | 36  | 35  |
| COG0679 |                                  | Predicted permeases                                                                                    | 3   | 1  | 5   | 6   |
| COG0697 |                                  | Permeases of the drug/metabolite transporter (DMT) superfamily                                         | 45  | 25 | 74  | 85  |
| COG0701 |                                  | Predicted permeases                                                                                    | 1   | 0  | 6   | 3   |
| COG0730 |                                  | Predicted permeases                                                                                    | 35  | 17 | 96  | 109 |
| COG0733 |                                  | Na <sup>+</sup> -dependent transporters of the SNF family                                              | 20  | 7  | 23  | 21  |
| COG0795 |                                  | Predicted permeases                                                                                    | 4   | 1  | 5   | 6   |
| COG1033 |                                  | Predicted exporters of the RND superfamily                                                             | 4   | 6  | 13  | 7   |
| COG1101 |                                  | ABC-type uncharacterized transport system, ATPase component                                            | 0   | 0  | 1   | 0   |
| COG1123 |                                  | ATPase components of various ABC-type transport systems, contain duplicated ATPase                     | 17  | 12 | 28  | 27  |
| COG1137 |                                  | ABC-type (unclassified) transport system, ATPase component                                             | 10  | 14 | 27  | 29  |
| COG1277 |                                  | ABC-type transport system involved in multi-copper enzyme maturation, permease component               | 2   | 1  | 5   | 6   |

|         |                                                                           |     |    |     |     |
|---------|---------------------------------------------------------------------------|-----|----|-----|-----|
| COG1279 | Lysine efflux permease                                                    | 3   | 2  | 4   | 8   |
| COG1559 | Predicted periplasmic solute-binding protein                              | 0   | 2  | 10  | 10  |
| COG1823 | Predicted Na <sup>+</sup> /dicarboxylate symporter                        | 3   | 1  | 4   | 1   |
| COG2215 | ABC-type uncharacterized transport system, permease component             | 3   | 1  | 0   | 1   |
| COG2244 | Membrane protein involved in the export of O-antigen and teichoic acid    | 2   | 0  | 3   | 2   |
| COG2252 | Permeases                                                                 | 56  | 26 | 67  | 39  |
| COG2270 | Permeases of the major facilitator superfamily                            | 2   | 6  | 11  | 6   |
| COG2358 | TRAP-type uncharacterized transport system, periplasmic component         | 26  | 11 | 22  | 25  |
| COG2391 | Predicted transporter component                                           | 31  | 17 | 105 | 142 |
| COG2409 | Predicted drug exporters of the RND superfamily                           | 1   | 0  | 4   | 0   |
| COG2962 | Predicted permeases                                                       | 4   | 1  | 11  | 12  |
| COG2985 | Predicted permease                                                        | 0   | 0  | 1   | 0   |
| COG3329 | Predicted permease                                                        | 2   | 0  | 2   | 1   |
| COG3822 | ABC-type sugar transport system, auxiliary component                      | 1   | 0  | 5   | 5   |
| COG3845 | ABC-type uncharacterized transport systems, ATPase components             | 19  | 8  | 21  | 26  |
| COG4134 | ABC-type uncharacterized transport system, periplasmic component          | 6   | 1  | 4   | 3   |
| COG4135 | ABC-type uncharacterized transport system, permease component             | 3   | 0  | 0   | 0   |
| COG4136 | ABC-type uncharacterized transport system, ATPase component               | 1   | 0  | 0   | 1   |
| COG4137 | ABC-type uncharacterized transport system, permease component             | 0   | 1  | 0   | 1   |
| COG4146 | Predicted symporter                                                       | 9   | 6  | 25  | 27  |
| COG4147 | Predicted symporter                                                       | 186 | 88 | 344 | 319 |
| COG4152 | ABC-type uncharacterized transport system, ATPase component               | 2   | 2  | 2   | 8   |
| COG4158 | Predicted ABC-type sugar transport system, permease component             | 0   | 0  | 2   | 0   |
| COG4172 | ABC-type uncharacterized transport system, duplicated ATPase component    | 24  | 8  | 6   | 19  |
| COG4174 | ABC-type uncharacterized transport system, permease component             | 9   | 0  | 11  | 8   |
| COG4178 | ABC-type uncharacterized transport system, permease and ATPase components | 0   | 0  | 2   | 0   |
| COG4239 | ABC-type uncharacterized transport system, permease component             | 10  | 4  | 14  | 11  |
| COG4533 | ABC-type uncharacterized transport system, periplasmic component          | 0   | 0  | 0   | 1   |
| COG4586 | ABC-type uncharacterized transport system, ATPase component               | 1   | 1  | 1   | 1   |
| COG4590 | ABC-type uncharacterized transport system, permease component             | 0   | 0  | 2   | 4   |
| COG4603 | ABC-type uncharacterized transport system, permease component             | 8   | 2  | 20  | 23  |
| COG4618 | ABC-type protease/lipase transport system, ATPase and permease components | 1   | 1  | 5   | 11  |
| COG4666 | TRAP-type uncharacterized transport system, fused permease components     | 17  | 13 | 26  | 14  |
| COG5006 | Predicted permease, DMT superfamily                                       | 0   | 1  | 0   | 0   |

|         |                                                                                                                          |                                                                                                       |     |     |     |     |
|---------|--------------------------------------------------------------------------------------------------------------------------|-------------------------------------------------------------------------------------------------------|-----|-----|-----|-----|
| COG0004 | Inorganic ion transport and metabolism                                                                                   | Ammonia permease                                                                                      | 161 | 70  | 167 | 195 |
| COG0025 |                                                                                                                          | NhaP-type Na <sup>+</sup> /H <sup>+</sup> and K <sup>+</sup> /H <sup>+</sup> antiporters              | 2   | 4   | 15  | 20  |
| COG0053 |                                                                                                                          | Predicted Co/Zn/Cd cation transporters                                                                | 7   | 1   | 2   | 11  |
| COG0168 |                                                                                                                          | Trk-type K <sup>+</sup> transport systems, membrane components                                        | 31  | 16  | 51  | 40  |
| COG0226 |                                                                                                                          | ABC-type phosphate transport system, periplasmic component                                            | 68  | 21  | 36  | 47  |
| COG0306 |                                                                                                                          | Phosphate/sulphate permeases                                                                          | 16  | 6   | 25  | 40  |
| COG0310 |                                                                                                                          | ABC-type Co <sup>2+</sup> transport system, permease component                                        | 1   | 0   | 2   | 0   |
| COG0370 |                                                                                                                          | Fe <sup>2+</sup> transport system protein B                                                           | 8   | 3   | 24  | 29  |
| COG0387 |                                                                                                                          | Ca <sup>2+</sup> /H <sup>+</sup> antiporter                                                           | 2   | 0   | 0   | 0   |
| COG0428 |                                                                                                                          | Predicted divalent heavy-metal cations transporter                                                    | 5   | 1   | 14  | 12  |
| COG0471 |                                                                                                                          | Di- and tricarboxylate transporters                                                                   | 25  | 6   | 29  | 26  |
| COG0474 |                                                                                                                          | Cation transport ATPase                                                                               | 35  | 11  | 22  | 6   |
| COG0475 |                                                                                                                          | Kef-type K <sup>+</sup> transport systems, membrane components                                        | 3   | 6   | 4   | 6   |
| COG0530 |                                                                                                                          | Ca <sup>2+</sup> /Na <sup>+</sup> antiporter                                                          | 11  | 9   | 35  | 55  |
| COG0569 |                                                                                                                          | K <sup>+</sup> transport systems, NAD-binding component                                               | 15  | 13  | 39  | 35  |
| COG0573 |                                                                                                                          | ABC-type phosphate transport system, permease component                                               | 21  | 8   | 11  | 25  |
| COG0581 |                                                                                                                          | ABC-type phosphate transport system, permease component                                               | 12  | 11  | 12  | 20  |
| COG0598 |                                                                                                                          | Mg <sup>2+</sup> and Co <sup>2+</sup> transporters                                                    | 2   | 1   | 3   | 2   |
| COG0600 |                                                                                                                          | ABC-type nitrate/sulfonate/bicarbonate transport system, permease component                           | 12  | 4   | 14  | 26  |
| COG0609 |                                                                                                                          | ABC-type Fe <sup>3+</sup> -siderophore transport system, permease component                           | 3   | 0   | 1   | 8   |
| COG0614 |                                                                                                                          | ABC-type Fe <sup>3+</sup> -hydroxamate transport system, periplasmic component                        | 3   | 0   | 1   | 1   |
| COG0619 |                                                                                                                          | ABC-type cobalt transport system, permease component CbiQ and related transporters                    | 0   | 0   | 0   | 1   |
| COG0651 |                                                                                                                          | Formate hydrogenlyase subunit 3/Multisubunit Na <sup>+</sup> /H <sup>+</sup> antiporter, MnhD subunit | 13  | 8   | 20  | 21  |
| COG0659 |                                                                                                                          | Sulfate permease and related transporters (MFS superfamily)                                           | 37  | 17  | 90  | 145 |
| COG0672 |                                                                                                                          | High-affinity Fe <sup>2+</sup> /Pb <sup>2+</sup> permease                                             | 1   | 0   | 0   | 0   |
| COG0715 |                                                                                                                          | ABC-type nitrate/sulfonate/bicarbonate transport systems, periplasmic components                      | 6   | 5   | 12  | 18  |
| COG0725 |                                                                                                                          | ABC-type molybdate transport system, periplasmic component                                            | 2   | 0   | 0   | 0   |
| COG0798 | Arsenite efflux pump ACR3 and related permeases                                                                          | 1                                                                                                     | 1   | 10  | 14  |     |
| COG0803 | ABC-type metal ion transport system, periplasmic component/surface adhesin                                               | 2                                                                                                     | 9   | 13  | 14  |     |
| COG1006 | Multisubunit Na <sup>+</sup> /H <sup>+</sup> antiporter, MnhC subunit                                                    | 1                                                                                                     | 0   | 2   | 4   |     |
| COG1009 | NADH:ubiquinone oxidoreductase subunit 5 (chain L)/Multisubunit Na <sup>+</sup> /H <sup>+</sup> antiporter, MnhA subunit | 54                                                                                                    | 20  | 147 | 130 |     |
| COG1055 | Na <sup>+</sup> /H <sup>+</sup> antiporter NhaD and related arsenite permeases                                           | 10                                                                                                    | 6   | 42  | 60  |     |

|         |                                                                                        |     |     |     |     |
|---------|----------------------------------------------------------------------------------------|-----|-----|-----|-----|
| COG1108 | ABC-type Mn <sup>2+</sup> /Zn <sup>2+</sup> transport systems, permease components     | 16  | 9   | 19  | 23  |
| COG1116 | ABC-type nitrate/sulfonate/bicarbonate transport system, ATPase component              | 14  | 10  | 11  | 8   |
| COG1117 | ABC-type phosphate transport system, ATPase component                                  | 11  | 8   | 11  | 16  |
| COG1118 | ABC-type sulfate/molybdate transport systems, ATPase component                         | 0   | 2   | 1   | 0   |
| COG1119 | ABC-type molybdenum transport system, ATPase component/photorepair protein PhrA        | 0   | 0   | 5   | 0   |
| COG1120 | ABC-type cobalamin/Fe <sup>3+</sup> -siderophores transport systems, ATPase components | 2   | 2   | 3   | 3   |
| COG1121 | ABC-type Mn/Zn transport systems, ATPase component                                     | 13  | 7   | 11  | 13  |
| COG1122 | ABC-type cobalt transport system, ATPase component                                     | 4   | 3   | 1   | 2   |
| COG1135 | ABC-type metal ion transport system, ATPase component                                  | 3   | 0   | 2   | 1   |
| COG1178 | ABC-type Fe <sup>3+</sup> transport system, permease component                         | 20  | 17  | 24  | 40  |
| COG1226 | Kef-type K <sup>+</sup> transport systems, predicted NAD-binding component             | 21  | 3   | 14  | 19  |
| COG1283 | Na <sup>+</sup> /phosphate symporter                                                   | 8   | 7   | 8   | 3   |
| COG1320 | Multisubunit Na <sup>+</sup> /H <sup>+</sup> antiporter, MnhG subunit                  | 0   | 2   | 3   | 0   |
| COG1392 | Phosphate transport regulator (distant homolog of PhoU)                                | 0   | 1   | 1   | 2   |
| COG1563 | Predicted subunit of the Multisubunit Na <sup>+</sup> /H <sup>+</sup> antiporter       | 1   | 0   | 0   | 0   |
| COG1629 | Outer membrane receptor proteins, mostly Fe transport                                  | 259 | 106 | 271 | 268 |
| COG1668 | ABC-type Na <sup>+</sup> efflux pump, permease component                               | 2   | 1   | 0   | 1   |
| COG1840 | ABC-type Fe <sup>3+</sup> transport system, periplasmic component                      | 30  | 12  | 32  | 35  |
| COG1863 | Multisubunit Na <sup>+</sup> /H <sup>+</sup> antiporter, MnhE subunit                  | 1   | 1   | 5   | 1   |
| COG1914 | Mn <sup>2+</sup> and Fe <sup>2+</sup> transporters of the NRAMP family                 | 5   | 2   | 7   | 6   |
| COG1918 | Fe <sup>2+</sup> transport system protein A                                            | 1   | 0   | 1   | 1   |
| COG1965 | Protein implicated in iron transport, frataxin homolog                                 | 0   | 2   | 0   | 0   |
| COG2059 | Chromate transport protein ChrA                                                        | 2   | 3   | 3   | 2   |
| COG2072 | Predicted flavoprotein involved in K <sup>+</sup> transport                            | 28  | 24  | 43  | 18  |
| COG2076 | Membrane transporters of cations and cationic drugs                                    | 0   | 0   | 7   | 4   |
| COG2111 | Multisubunit Na <sup>+</sup> /H <sup>+</sup> antiporter, MnhB subunit                  | 1   | 0   | 9   | 5   |
| COG2116 | Formate/nitrite family of transporters                                                 | 0   | 0   | 0   | 2   |
| COG2212 | Multisubunit Na <sup>+</sup> /H <sup>+</sup> antiporter, MnhF subunit                  | 2   | 1   | 0   | 0   |
| COG2217 | Cation transport ATPase                                                                | 23  | 11  | 39  | 32  |
| COG2223 | Nitrate/nitrite transporter                                                            | 0   | 4   | 0   | 0   |
| COG2239 | Mg/Co/Ni transporter MgtE (contains CBS domain)                                        | 12  | 8   | 33  | 38  |
| COG3004 | Na <sup>+</sup> /H <sup>+</sup> antiporter                                             | 7   | 8   | 33  | 39  |
| COG3067 | Na <sup>+</sup> /H <sup>+</sup> antiporter                                             | 15  | 2   | 10  | 6   |
| COG3158 | K <sup>+</sup> transporter                                                             | 3   | 0   | 0   | 5   |

|         |                                                               |                                                                                                                        |    |    |     |     |
|---------|---------------------------------------------------------------|------------------------------------------------------------------------------------------------------------------------|----|----|-----|-----|
| COG3221 |                                                               | ABC-type phosphate/phosphonate transport system, periplasmic component                                                 | 2  | 3  | 1   | 2   |
| COG3638 |                                                               | ABC-type phosphate/phosphonate transport system, ATPase component                                                      | 3  | 0  | 2   | 1   |
| COG3639 |                                                               | ABC-type phosphate/phosphonate transport system, permease component                                                    | 4  | 1  | 4   | 4   |
| COG4107 |                                                               | ABC-type phosphonate transport system, ATPase component                                                                | 1  | 0  | 0   | 3   |
| COG4148 |                                                               | ABC-type molybdate transport system, ATPase component                                                                  | 2  | 0  | 0   | 3   |
| COG4149 |                                                               | ABC-type molybdate transport system, permease component                                                                | 0  | 1  | 2   | 5   |
| COG4208 |                                                               | ABC-type sulfate transport system, permease component                                                                  | 0  | 0  | 0   | 1   |
| COG4525 |                                                               | ABC-type taurine transport system, ATPase component                                                                    | 2  | 0  | 6   | 6   |
| COG4531 |                                                               | ABC-type Zn <sup>2+</sup> transport system, periplasmic component/surface adhesin                                      | 7  | 4  | 6   | 1   |
| COG4535 |                                                               | Putative Mg <sup>2+</sup> and Co <sup>2+</sup> transporter CorC                                                        | 2  | 3  | 11  | 16  |
| COG4536 |                                                               | Putative Mg <sup>2+</sup> and Co <sup>2+</sup> transporter CorB                                                        | 15 | 8  | 11  | 14  |
| COG4555 |                                                               | ABC-type Na <sup>+</sup> transport system, ATPase component                                                            | 2  | 1  | 1   | 1   |
| COG4594 |                                                               | ABC-type Fe <sup>3+</sup> -citrate transport system, periplasmic component                                             | 0  | 0  | 0   | 1   |
| COG4604 |                                                               | ABC-type enterochelin transport system, ATPase component                                                               | 0  | 0  | 0   | 1   |
| COG4615 |                                                               | ABC-type siderophore export system, fused ATPase and permease components                                               | 1  | 0  | 0   | 1   |
| COG4651 |                                                               | Kef-type K <sup>+</sup> transport system, predicted NAD-binding component                                              | 0  | 1  | 1   | 6   |
| COG4985 |                                                               | ABC-type phosphate transport system, auxiliary component                                                               | 0  | 0  | 1   | 0   |
| COG0811 | Intracellular trafficking, secretion, and vesicular transport | Biopolymer transport proteins                                                                                          | 60 | 26 | 123 | 183 |
| COG0823 |                                                               | Periplasmic component of the Tol biopolymer transport system                                                           | 16 | 16 | 25  | 44  |
| COG0848 |                                                               | Biopolymer transport protein                                                                                           | 18 | 8  | 33  | 28  |
| COG2095 |                                                               | Multiple antibiotic transporter                                                                                        | 3  | 0  | 10  | 10  |
| COG3114 |                                                               | Heme exporter protein D                                                                                                | 0  | 0  | 2   | 0   |
| COG5101 |                                                               | Importin beta-related nuclear transport receptor                                                                       | 0  | 1  | 1   | 1   |
| COG5122 |                                                               | Transport protein particle (TRAPP) complex subunit                                                                     | 0  | 0  | 1   | 0   |
| COG5347 |                                                               | GTPase-activating protein that regulates ARFs (ADP-ribosylation factors), involved in ARF-mediated vesicular transport | 1  | 0  | 0   | 0   |
| COG1133 | Lipid metabolism                                              | ABC-type long-chain fatty acid transport system, fused permease and ATPase components                                  | 12 | 8  | 18  | 12  |
| COG2031 |                                                               | Short chain fatty acids transporter                                                                                    | 0  | 0  | 3   | 0   |
| COG2067 |                                                               | Long-chain fatty acid transport protein                                                                                | 1  | 0  | 2   | 1   |
| COG2867 |                                                               | Oligoketide cyclase/lipid transport protein                                                                            | 0  | 3  | 11  | 10  |
| COG1953 | Nucleotide transport and metabolism                           | Cytosine/uracil/thiamine/allantoin permeases                                                                           | 7  | 3  | 5   | 8   |
| COG1972 |                                                               | Nucleoside permease                                                                                                    | 21 | 6  | 22  | 34  |
| COG2233 |                                                               | Xanthine/uracil permeases                                                                                              | 10 | 5  | 10  | 13  |
| COG5042 |                                                               | Purine nucleoside permease                                                                                             | 1  | 1  | 0   | 0   |
| COG0396 | Posttranslational                                             | ABC-type transport system involved in Fe-S cluster assembly, ATPase                                                    | 24 | 14 | 48  | 69  |



|         |                                                                                   |                                                                                                       |     |    |     |     |
|---------|-----------------------------------------------------------------------------------|-------------------------------------------------------------------------------------------------------|-----|----|-----|-----|
| COG0396 | modification,<br>protein turnover,<br>chaperones                                  | component                                                                                             | 24  | 14 | 48  | 69  |
| COG0555 |                                                                                   | ABC-type sulfate transport system, permease component                                                 | 2   | 0  | 1   | 1   |
| COG0719 |                                                                                   | ABC-type transport system involved in Fe-S cluster assembly, permease component                       | 79  | 34 | 102 | 185 |
| COG0755 |                                                                                   | ABC-type transport system involved in cytochrome c biogenesis, permease component                     | 26  | 6  | 43  | 73  |
| COG2386 |                                                                                   | ABC-type transport system involved in cytochrome c biogenesis, permease component                     | 7   | 1  | 6   | 10  |
| COG4133 |                                                                                   | ABC-type transport system involved in cytochrome c biogenesis, ATPase component                       | 3   | 1  | 5   | 7   |
| COG5265 |                                                                                   | ABC-type transport system involved in Fe-S cluster assembly, permease and ATPase components           | 12  | 10 | 28  | 33  |
| COG5238 | RNA processing and modification                                                   | Ran GTPase-activating protein (RanGAP) involved in mRNA processing and transport                      | 0   | 0  | 1   | 0   |
| COG0767 | Secondary metabolites biosynthesis, transport and catabolism                      | ABC-type transport system involved in resistance to organic solvents, permease component              | 6   | 7  | 22  | 32  |
| COG1127 |                                                                                   | ABC-type transport system involved in resistance to organic solvents, ATPase component                | 3   | 2  | 19  | 18  |
| COG1463 |                                                                                   | ABC-type transport system involved in resistance to organic solvents, periplasmic component           | 3   | 2  | 21  | 17  |
| COG2854 |                                                                                   | ABC-type transport system involved in resistance to organic solvents, auxiliary component             | 0   | 2  | 4   | 4   |
| COG3127 |                                                                                   | Predicted ABC-type transport system involved in lysophospholipase L1 biosynthesis, permease component | 6   | 4  | 6   | 21  |
| COG4181 |                                                                                   | Predicted ABC-type transport system involved in lysophospholipase L1 biosynthesis, ATPase component   | 7   | 1  | 12  | 15  |
| COG4663 |                                                                                   | TRAP-type mannitol/chloroaromatic compound transport system, periplasmic component                    | 139 | 40 | 117 | 126 |
| COG4664 |                                                                                   | TRAP-type mannitol/chloroaromatic compound transport system, large permease component                 | 37  | 19 | 105 | 110 |
| COG4665 |                                                                                   | TRAP-type mannitol/chloroaromatic compound transport system, small permease component                 | 14  | 4  | 42  | 35  |
| COG3109 |                                                                                   | Activator of osmoprotectant transporter ProP                                                          | 0   | 0  | 1   | 1   |
| COG4191 | Signal transduction histidine kinase regulating C4-dicarboxylate transport system | 1                                                                                                     | 0   | 4  | 5   |     |
| COG5037 |                                                                                   | Gluconate transport-inducing protein                                                                  | 2   | 0  | 0   | 1   |

Figure S1

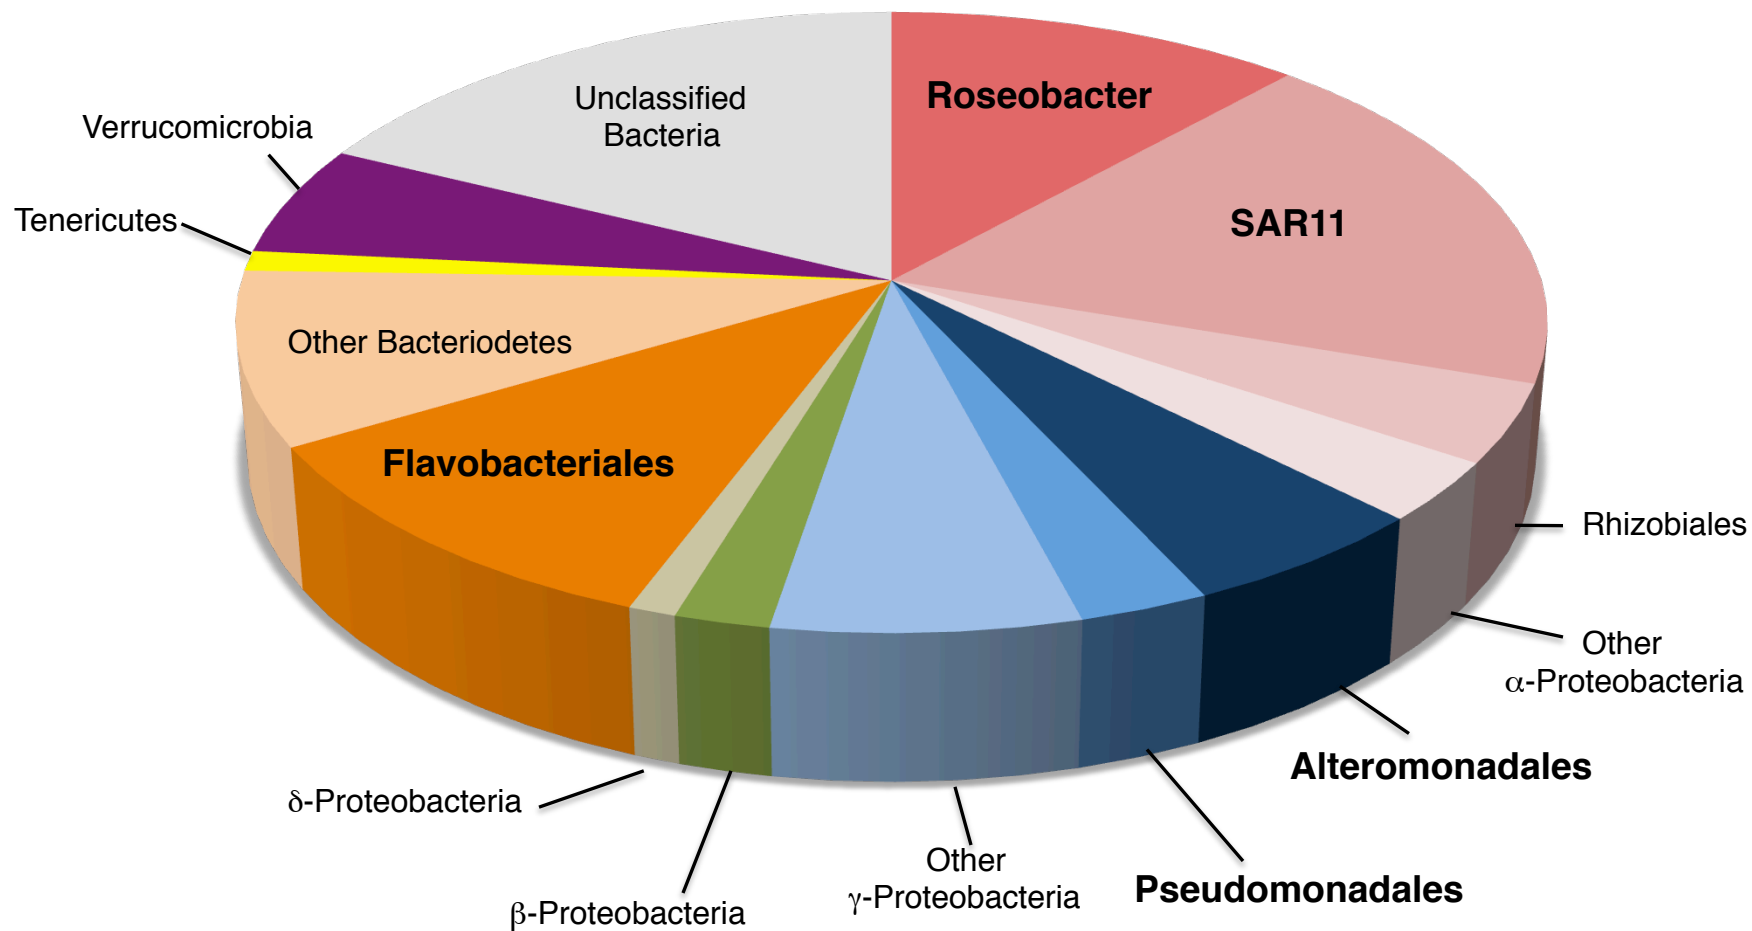

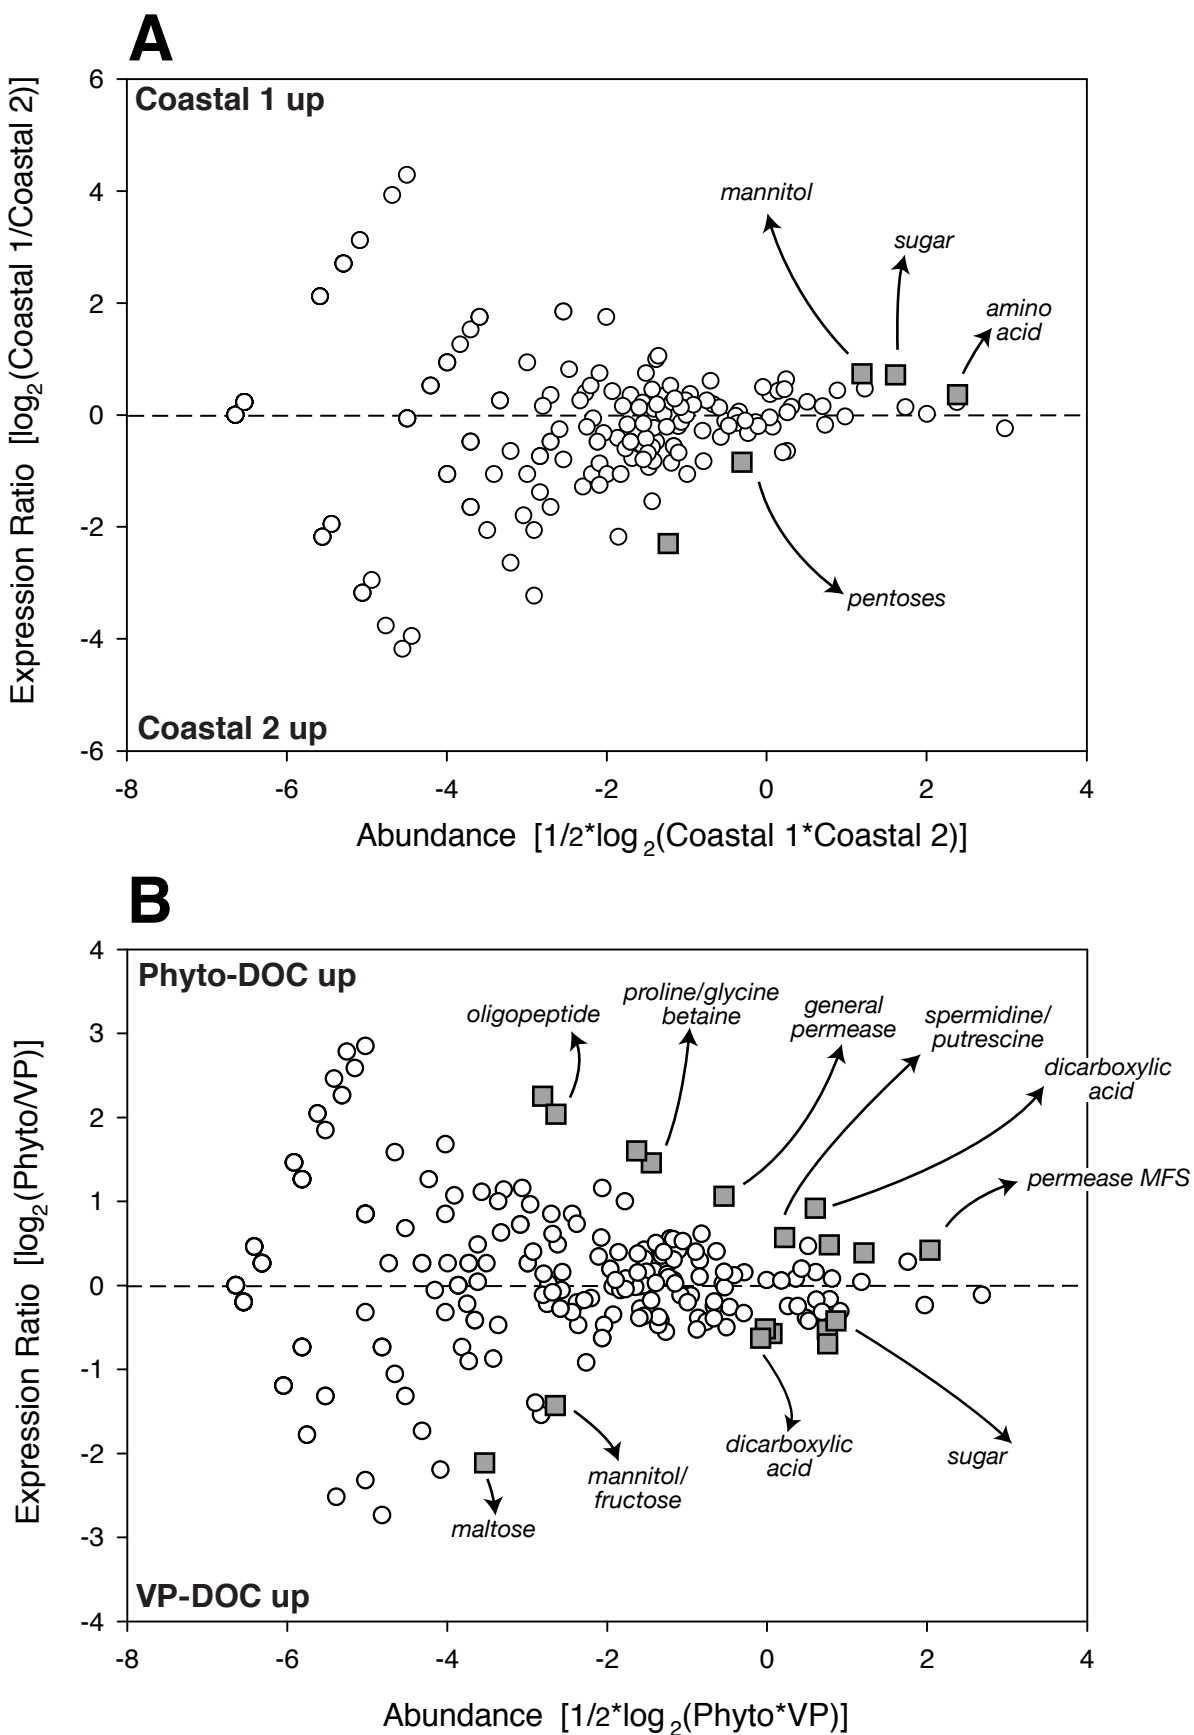

Number of transcripts:

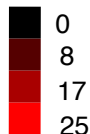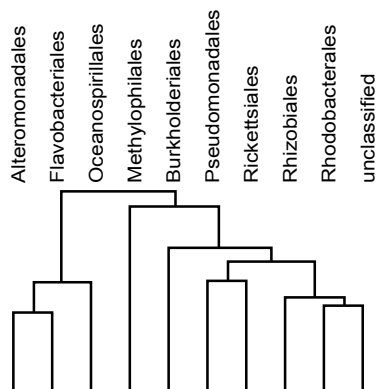

Figure S3

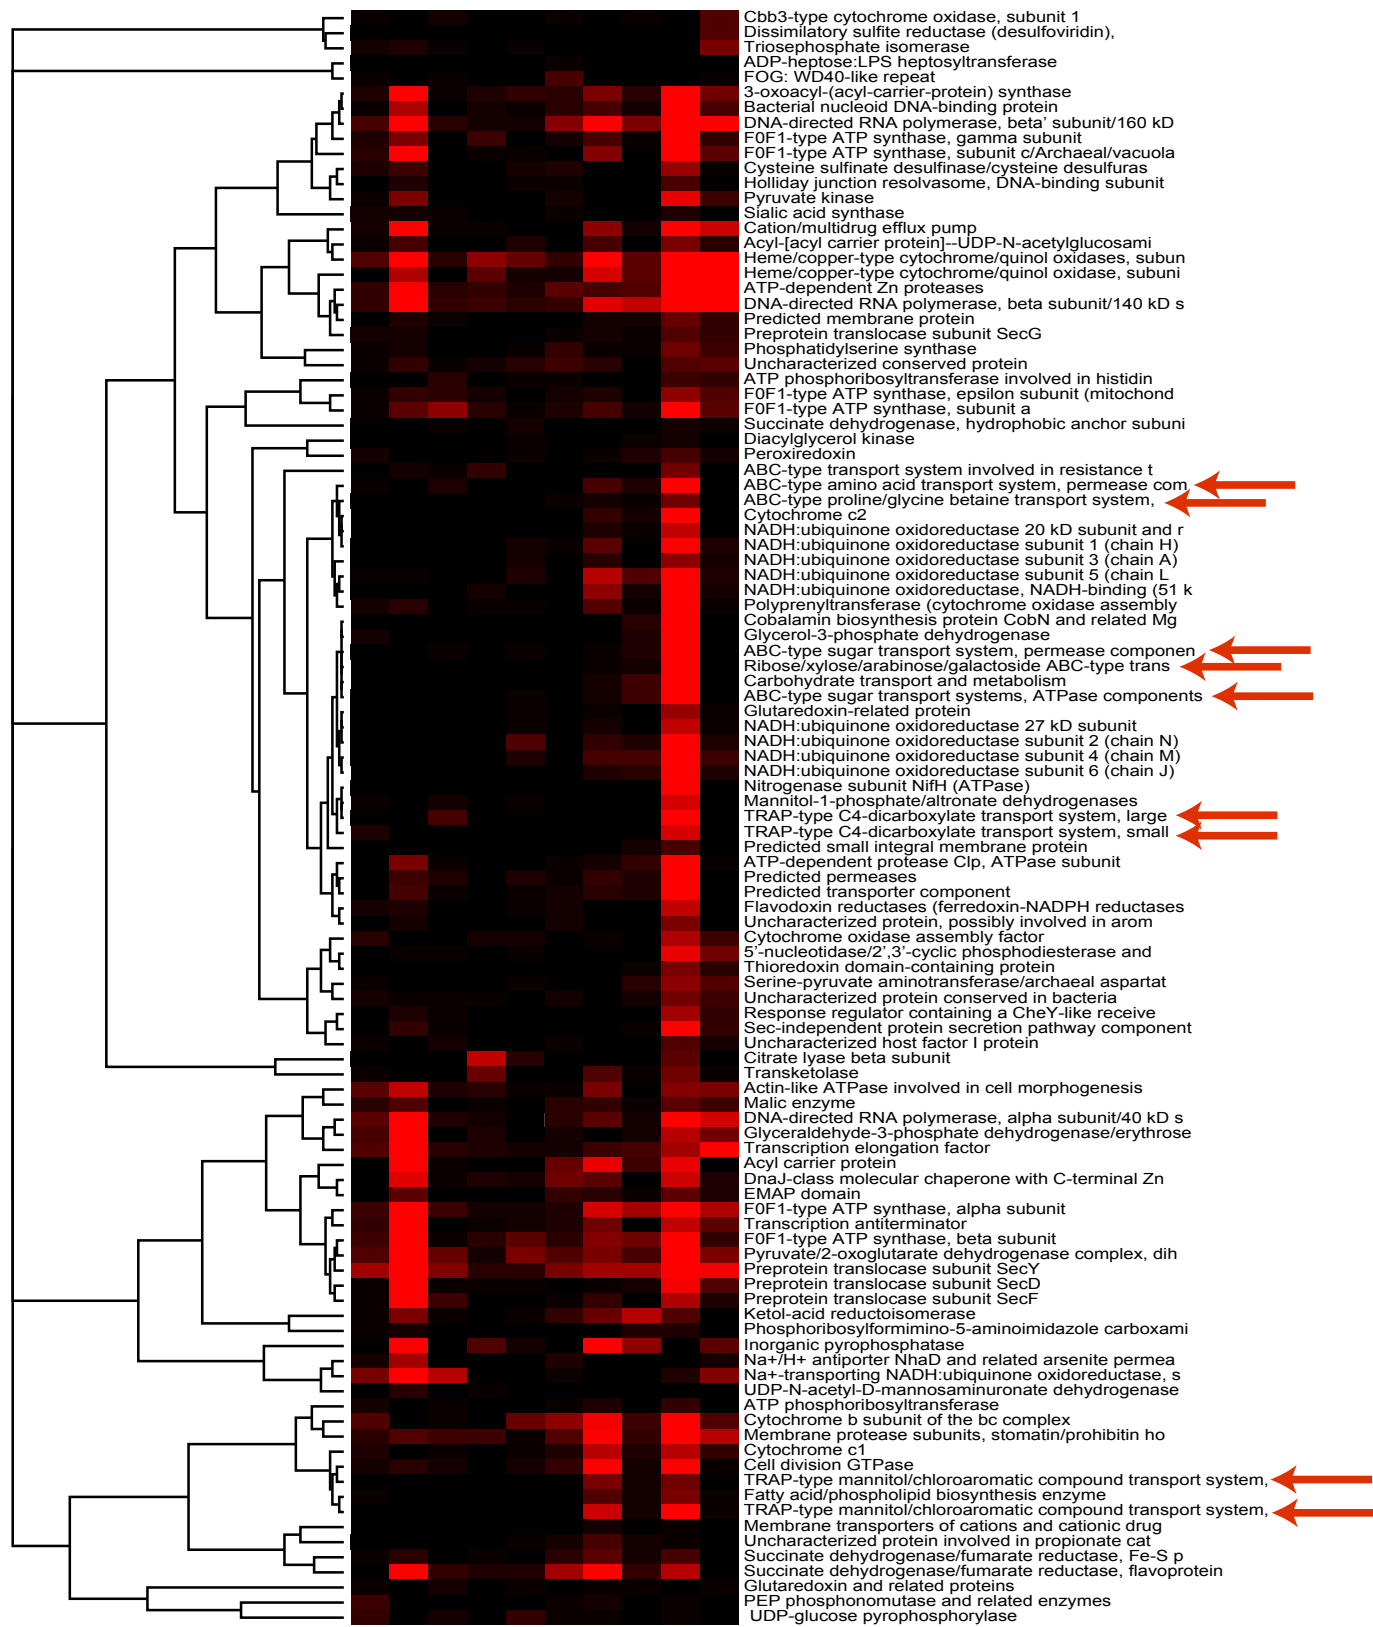

Number of transcripts:

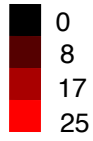

Figure S4

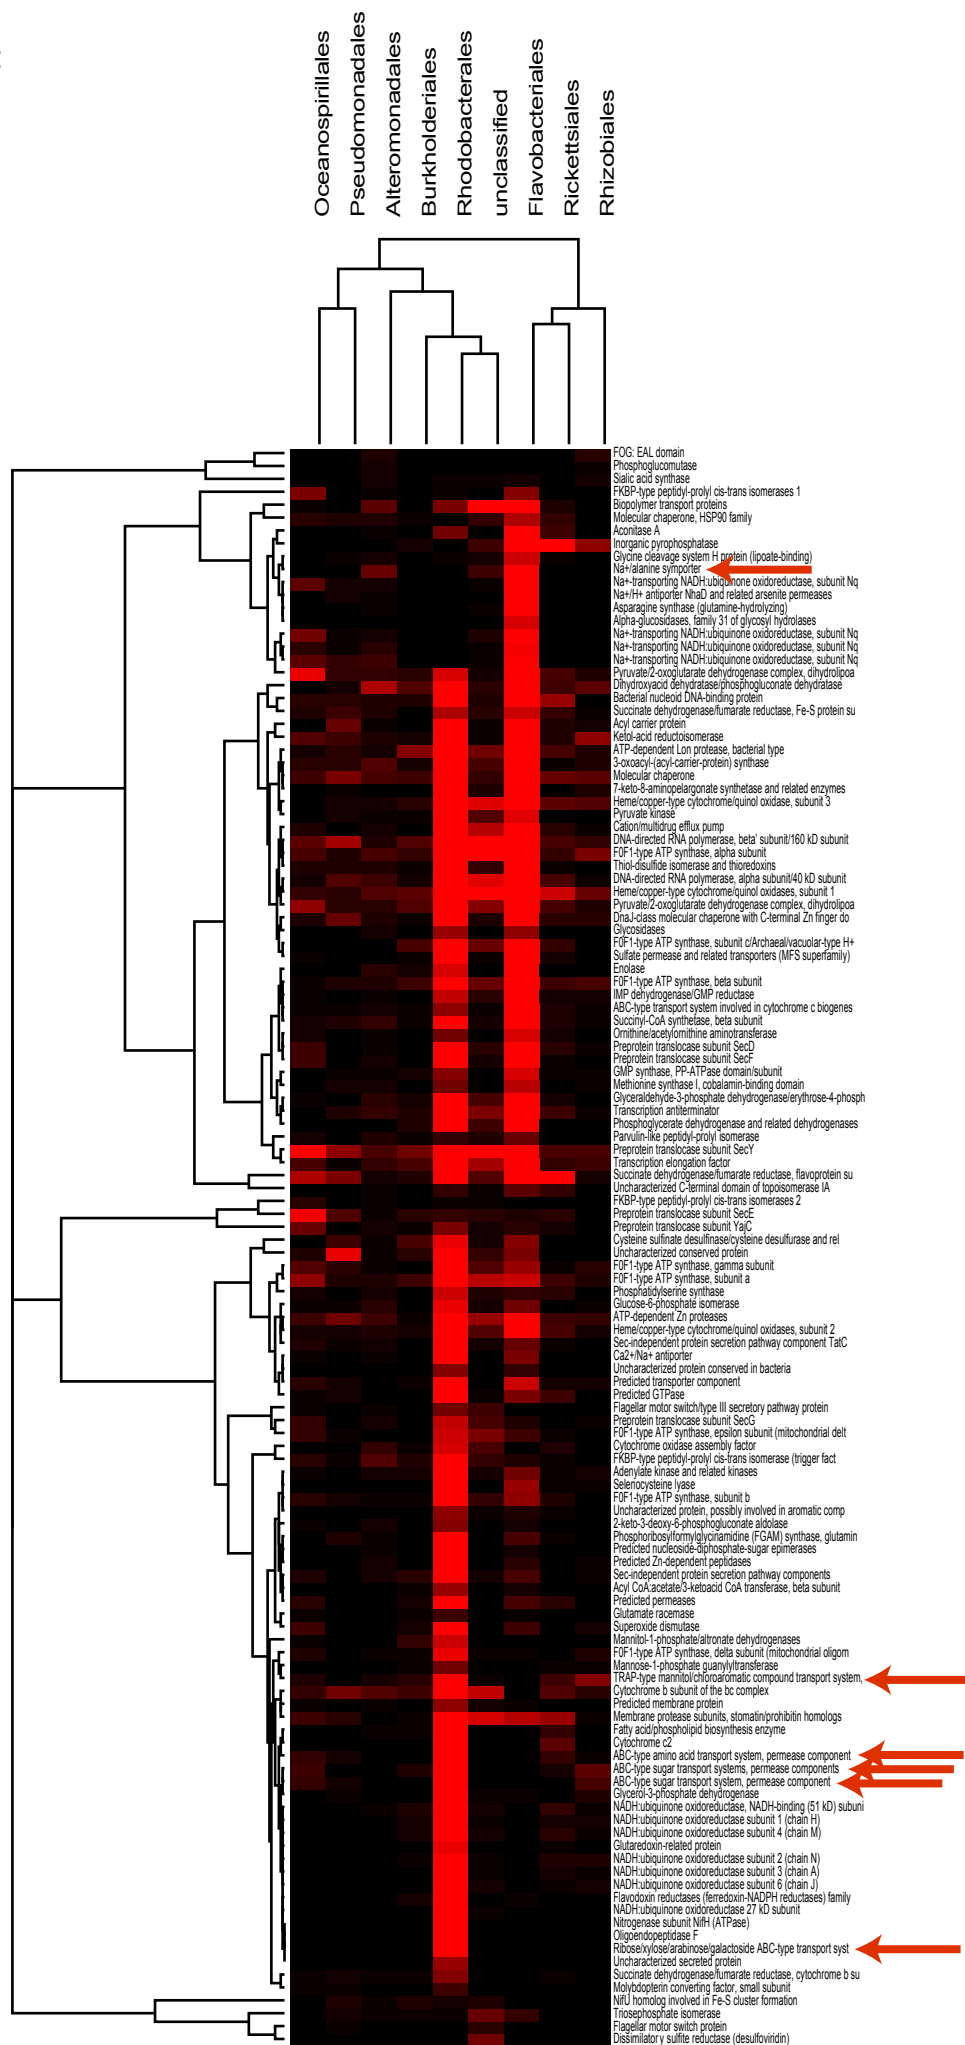

Supplement: emi0012-0616-SD1.pdf [file emi0012-0616-SD1.pdf]
